# Supplementary material for: Syndrome Differentiation and Treatment Regularity in Traditional Chinese Medicine for Type 2 Diabetes: A Text Mining Analysis
Source: PubMed Central journal article supplement (PMC8733618; doi:10.3389/fendo.2021.728032), 2021-12-23
Supplement: DataSheet_1.pdf [file DataSheet_1.pdf]

# Supplementary materials

## Supplementary 1

### Implementation of file reading and thesaurus establishment code

```
import pandas
#Establishment of corpus, collection of all documents
filePaths=[]
fileContents=[]
#The file directory where the file is located is named root; all subdirectories under root are named dirs; all files under root are named files
#Traverse, get all the files needed in the input directory
for root,dirs,files in os.walk('/home/dell/stu/dzl/Meta/txt3654'):
#Get all the files in the root directory, traverse again and append them to the filepaths variable
    for name in files:
        filePath=os.path.join(root,name)
        filePaths.append(filePath)
#Use the codecs.open() method to open each file, use the read() method of the file to read the text in turn, and store all the text content in the variable fileContent in turn, Then the close() method closes the file.
#1. File path, #2. Open method, 3. File encoding
        f=codecs.open(filePath,'r','utf-8')
        fileContent=f.read()
        f.close()
        fileContents.append(fileContent)

#Create data frame corpus, add two variables filePaths and fileContents as an array
corpus=pandas.DataFrame({'filePath':filePaths,'content':fileContents})
corpus
```

## Supplementary 2

**Fig 1:**

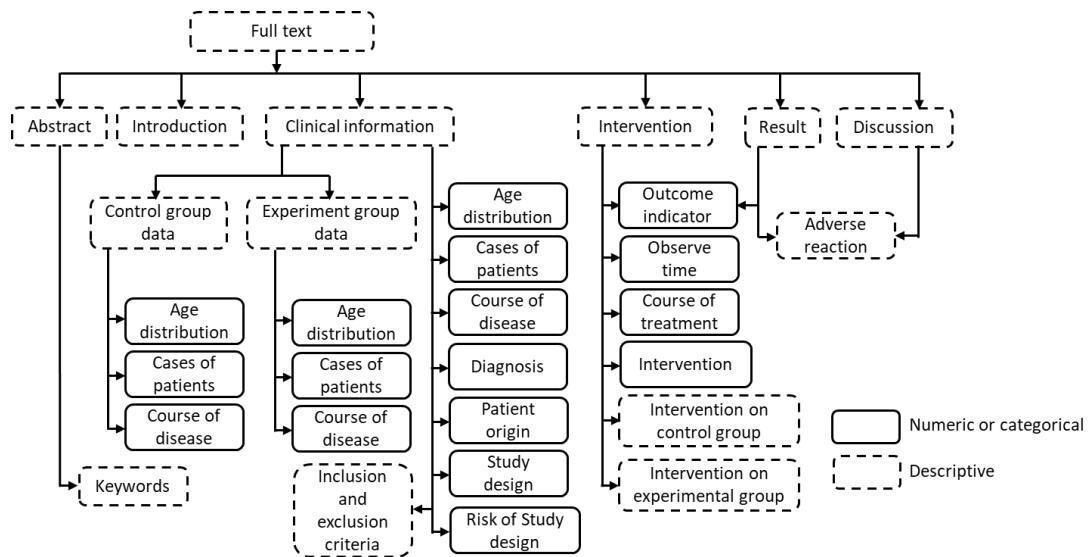

## Supplementary 3

**Fig 2:**

| index | title                          | intermediate  | male cases    | female cases  | male cases    | female case cases | in trea control | grou          | The number    | The number    | Total numbe   | Diseasename                | chitresesynd | prescription                 | medicine | effective rate |
|-------|--------------------------------|---------------|---------------|---------------|---------------|-------------------|-----------------|---------------|---------------|---------------|---------------|----------------------------|--------------|------------------------------|----------|----------------|
| 17    | Treatment of 1 Subjects an     | not described | not described | not described | not described | not described     | not described   | not described | not described | not described | not described | Type 2 diabetes            |              | Balsam pear capsules         |          | 97.10%         |
| 17    | Clinical study 1 Materials an  | not described | not described | not described | not described | not described     | not described   | not described | not described | not described | not described | Type 3 diabetes            |              | Balsam pear capsules         |          | 96.80%         |
| 17    | 46 cases of ty 1.1 Clinical D  | not described | not described | not described | not described | not described     | not described   | not described | not described | not described | not described | Type 4 diabetes            |              | Balsam pear capsules         |          | 95.50%         |
| 18    | Clinical obser 1.1 Clinical D  | 22            | 21            | 23            | 20            | not described     | not described   | not described | not described | not described | not described | Type 5 diabetes            |              | Balsam pear capsules         |          | 95.00%         |
| 18    | Randomized controlled trial    | not described | not described | not described | not described | not described     | not described   | not described | not described | not described | not described | Type 6 diabetes            |              | Balsam pear capsules         |          | 94.80%         |
| 18    | Effect of Adc 1.1 1 object a   | not described | not described | not described | not described | not described     | not described   | not described | not described | not described | not described | Type 7 diabetes            |              | Balsam pear capsules         |          | 93.75%         |
| 19    | Effect of low 1 Clinical dat   | 10            | 10            | 10            | 10            | not described     | not described   | not described | not described | not described | not described | Type 8 diabetes            |              |                              |          | 93.75%         |
| 24    | Clinical obser 1 clinical data | not described | not described | not described | not described | not described     | not described   | not described | not described | not described | not described | Type 9 diabetes            |              | Qi Nourishing Ginseng, Chi   |          | 93.62%         |
| 24    | Treatment of Clinical data     | 22            | 18            | 17            | 13            | not described     | not described   | not described | not described | not described | not described | Type 10 diabetes           |              | Qi Nourishing Ginseng, Chi   |          | 93.30%         |
| 24    | Clinical study 1 Clinical data | not described | not described | not described | not described | not described     | not described   | not described | not described | not described | not described | Type 11 diabetes           |              | Qi Nourishing Ginseng, Chi   |          | 93.20%         |
| 25    | 30 cases of si The clinical d  | 10            | 20            | 7             | 23            | not described     | not described   | not described | not described | not described | not described | Type 12 diabetes           |              | Sugar d capsule              |          | 92.90%         |
| 25    | Effects of Tai 1 Data and m    | 63            | 57            | 60            | 40            | not described     | not described   | not described | not described | not described | not described | Type 13 diabetes           |              | Sugar d capsule              |          | 92.86%         |
| 25    | Postoperative 1 Clinical dat   | not described | not described | not described | not described | not described     | not described   | not described | not described | not described | not described | Type 14 diabetes           |              | Sugar d capsule              |          | 92.86%         |
| 26    | Effect of clea 1.1 General D   | not described | not described | not described | not described | not described     | not described   | not described | not described | not described | not described | Type 15 diabetes           |              | Compound w Rhubarb, Coj      |          | 92.70%         |
| 27    | Therapeutic 1 Clinical         | 13            | 51            | 10            | 62            | not               | not             | not           | not           | not           | not           | Type 16                    |              | Heat- Rhubarb,               |          | 92.50%         |
| 27    | Observation c 1.1 General D    | 14            | 17            | 16            | 15            | not described     | not described   | not described | not described | not described | not described | Type 17 diabetes           |              | Heat-clearing, Rhubarb, Coj  |          | 92.50%         |
| 27    | Effect of Qiu 1 Data and M     | 24            | 22            | 23            | 23            | not described     | not described   | not described | not described | not described | not described | Type 18 diabetes           |              | Heat-clearing, Rhubarb, Coj  |          | 92.00%         |
| 31    | Effect of Tian 1 Clinical dat  | 18            | 13            | 18            | 13            | not described     | not described   | not described | not described | not described | not described | Type 19 diabetes           |              | Tianmai quench tablet        |          | 91.84%         |
| 31    | Clinical study 1.1 General d   | 20            | 10            | 19            | 11            | not described     | not described   | not described | not described | not described | not described | Type 20 diabetes           |              | Tianmai quench tablet        |          | 90.00%         |
| 43    | Study on imp Materials and     | 18            | 12            | 18            | 12            | not described     | not described   | not described | not described | not described | not described | Type 21 diabetes           |              | Dan leech gh Dumpi, leech    |          | 90.30%         |
| 43    | Effect of mos 1 data and m     | 20            | 10            | 19            | 11            | not described     | not described   | not described | not described | not described | not described | Type 22 diabetes           |              | Dan leech gh Dumpi, leech    |          | 89.60%         |
| 47    | Treatment of 1 clinical data   | 16            | 51            | 9             | 22            | not described     | not described   | not described | not described | not described | not described | Type 23 diab Qi stagnation |              | Danji hypogly rhizoma bletif |          | 89.00%         |
| 47    | Clinical study 1. Objects an   | not described | not described | not described | not described | not described     | not described   | not described | not described | not described | not described | Type 24 diab Qi stagnation |              | Danji hypogly rhizoma bletif |          | 88.89%         |
| 47    | Influence of c 1 Subjects an   | not described | not described | not described | not described | not described     | not described   | not described | not described | not described | not described | Type 25 diab Qi stagnation |              | Danji hypogly rhizoma bletif |          | 88.89%         |
| 48    | Effect of Dan Subjects and     | not described | not described | not described | not described | not described     | not described   | not described | not described | not described | not described | Type 26 diab Qi stagnation |              | Danji hypoglycemic capsule   |          | 88.33%         |
| 48    | Clinical obser 1 Clinical dat  | not described | not described | not described | not described | not described     | not described   | not described | not described | not described | not described | Type 27 diab Qi stagnation |              | Danji hypoglycemic capsule   |          | 88.33%         |
| 49    | Intervention c Materials and   | not described | not described | not described | not described | not described     | not described   | not described | not described | not described | not described | Type 28 diabetes           |              | Danji hypoglycemic capsule   |          | 87.50%         |
| 49    | 45 cases of at 1 Clinical dat  | 24            | 21            | 23            | 21            | not described     | not described   | not described | not described | not described | not described | Type 29 diabetes           |              | Danji hypoglycemic capsule   |          | 87.27%         |

## Supplementary 4

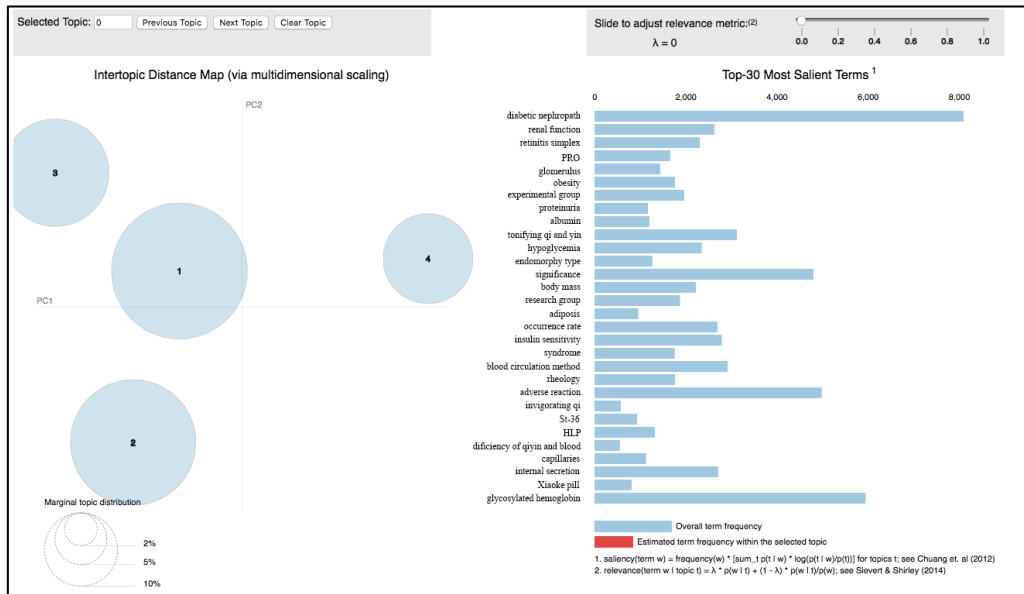

**Fig 3: Topic modeling subject word extraction result graph**

Topic extraction diagram, the left circle represents the number of topics extracted, the distance between the circle and the circle represents the similarity of the two topics; the bar graph on the right represents the topic words under a certain topic.

## Supplementary 5

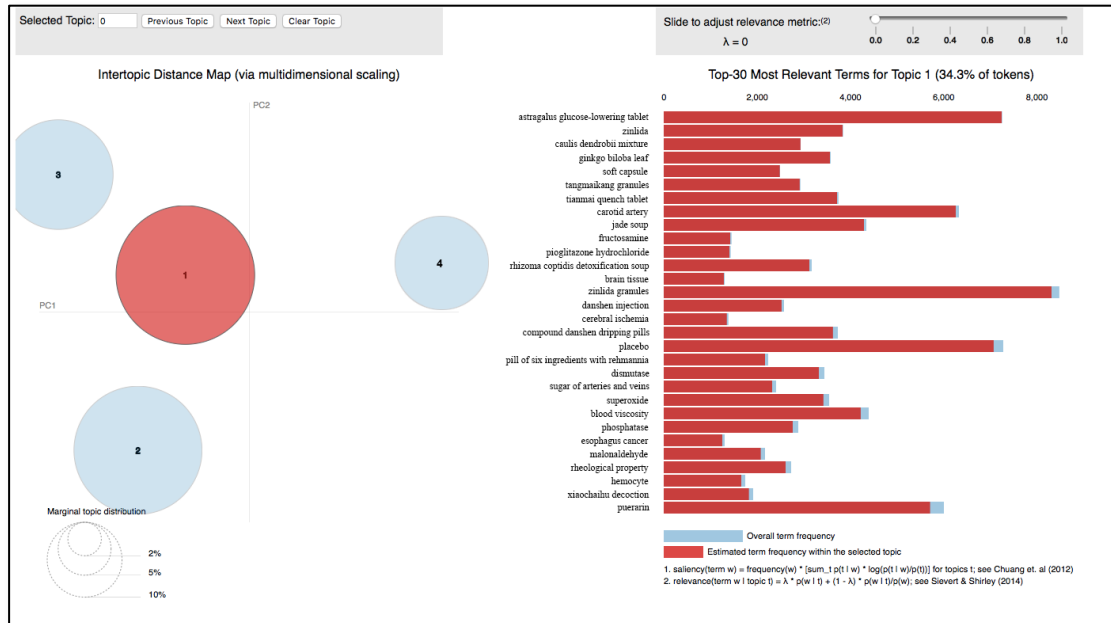

**Fig 4: Example image of the subject word extraction results of the LDA model**

The red circle on the left represents the specific For a topic, when the mouse is clicked on the topic, the red part of the bar graph on the right is the key word under this topic; Topic 1 literature research disease may be diabetes complicated with cardiovascular disease. Topic 2 takes non-drug therapy as the theme; In topic 3, it can be seen that obesity is also the main symptom of diabetes, and the resulting obesity diabetes is also a clinical research hotspot. Topic 4 focuses on urinary protein, glomerulus, proteinuria, diabetic nephropathy, tripterygium wilfordii, urea nitrogen, and chronic nephritis, indicating that studies on diabetic nephropathy are mainly in this kind of literature.

## Supplementary 6

**Table 1 Top 10 keywords map for each of the 4 topics**

|                                                                                                                                                                                                                         |
|-------------------------------------------------------------------------------------------------------------------------------------------------------------------------------------------------------------------------|
| Topic #1:<br>Diabetic nephropathy, Renal function, Urine protein, Glomerular, supplementing qi and nourishing yin, Proteinuria, albumin, Activating blood circulation to dissipate stasis, Hypertension, Microvascular  |
| Topic #2:<br>Significant, Metformin, Glucose, Glycated hemoglobin, Insulin sensitivity, Obviously improved, Rheology, Activating blood circulation to dissipate stasis, Collateral, supplementing qi and nourishing yin |
| Topic #3:<br>Glycated hemoglobin, Adverse reactions, occurrence rate, Hypoglycemia, The experimental group, Research group, Metformin, Antidiabetic, Average age, Diabetes                                              |
| Topic #4:<br>Retinitis simplex, Significance, Obesity, Body fat mass, Endocrine, Syndrome, Endomorphy type, Insulin sensitivity, Hypertension, Adiposis                                                                 |

Represents the top 10 keywords for each topic under 4 themes; All the included documents are divided into 4 topics for keyword topic extraction, and each topic extraction result selects the top 10 keywords whose appearance frequency ranks in the top 10. Topic 1 as gold stilbene hypoglycemic granule, ginkgo leaf, wheat/day, etc, ginkgo leaf, compound danshen dropping pill and salvia miltiorrhiza injection and carotid artery, brain, cerebral ischemia, blood viscosity together and show theme class 1 literature research disease may be diabetes complicated with cardiovascular disease. Topic 2 takes non-drug therapy as the theme, and the key words include satisfaction, Taijiquan, self-management, nursing staff, Chinese medicine diet therapy, etc, indicating that diet, exercise and self-habit are also commonly used methods for diabetes in such literature. In topic 3, the most concentrated keywords are obesity, obesity, leptin level, percentage of body fat, weight-loss prescription, sex hormones, etc. It can be seen that obesity is also the main symptom of diabetes, and the resulting obesity diabetes is also a clinical research hotspot. Topic 4 focuses on urinary protein, glomerulus, proteinuria, diabetic nephropathy, tripterygium wilfordii, urea nitrogen, and chronic nephritis, From the extraction results, it can be seen that the focus of literature research is diabetic nephropathy and obese diabetes, and the treatment is based on the principle of nourishing qi and yin and promoting blood circulation to remove stasis.
